# Supplementary material
Source: PubMed Central journal article supplement (PMC8688212)
Supplement: NIHMS1734459-supplement-1.pdf [file NIHMS1734459-supplement-1.pdf]

**Supplemental Table 1. Association of Vitamin D Metabolites and the VMR with Percent Annual Change in Thoracic and Lumbar Spine BMD<sup>a</sup>**

|          | <b>VMR</b>                                    |       | <b>25D<sub>3</sub></b>                        |       | <b>24,25D<sub>3</sub></b>                     |       | <b>1,25D<sub>3</sub></b>                      |       |
|----------|-----------------------------------------------|-------|-----------------------------------------------|-------|-----------------------------------------------|-------|-----------------------------------------------|-------|
|          | Annual Change in BMD<br>Per 50% Lower (95%CI) | P     | Annual Change in BMD<br>Per 50% Lower (95%CI) | P     | Annual Change in BMD<br>Per 50% Lower (95%CI) | P     | Annual Change in BMD<br>Per 50% Lower (95%CI) | P     |
| Thoracic | -0.2%(-0.3%, -0.01%)                          | 0.041 | -0.1% (-0.2%, 0.01%)                          | 0.061 | -0.1% (-0.2%, 0.1%)                           | 0.340 | 0.01% (-0.2%, 0.2%)                           | 0.946 |
| Lumbar   | -0.2%(-0.4%, -0.02%)                          | 0.032 | 0.02% (-0.2%, 0.2%)                           | 0.841 | -0.05% (-0.1%, 0.05%)                         | 0.322 | -0.1% (-0.3%, 0.06%)                          | 0.181 |

<sup>a</sup>Data Reported for fully adjusted models, adjusted for age, sex, race, season of measurement, clinic site an, BMI, baseline eGFR, serum calcium, phosphate, parathyroid hormone and fibroblast growth factor 23

**Supplemental Table 2: Association of Vitamin D Metabolites and the VMR with Percent Annual Change in Total Hip BMD in VDBP Subcohort**

|                             | <b>VMR</b>                                    |        | <b>25D<sub>3</sub></b>                        |       | <b>24,25D<sub>3</sub></b>                     |       | <b>1,25D<sub>3</sub></b>                      |       |
|-----------------------------|-----------------------------------------------|--------|-----------------------------------------------|-------|-----------------------------------------------|-------|-----------------------------------------------|-------|
|                             | Annual Change in BMD<br>Per 50% Lower (95%CI) | P      | Annual Change in BMD<br>Per 50% Lower (95%CI) | P     | Annual Change in BMD<br>Per 50% Lower (95%CI) | P     | Annual Change in BMD<br>Per 50% Lower (95%CI) | P     |
| Fully Adjusted <sup>a</sup> | -0.5% (-0.7%, -0.2%)                          | >0.001 | -0.2% (-0.1%, 0.01%)                          | 0.180 | -0.2% (-0.4%, -0.1%)                          | 0.008 | -0.3% (-0.6%, 0.05%)                          | 0.101 |
| VDBP Model <sup>b</sup>     | -0.5% (-0.7%, -0.2%)                          | >0.001 | -0.2% (-0.1%, 0.01%)                          | 0.180 | -0.2% (-0.4%, -0.1%)                          | 0.008 | -0.3% (-0.6%, 0.05%)                          | 0.101 |

a Adjusted for age, sex, race, season of measurement, clinic site an, BMI, baseline eGFR, serum calcium, phosphate, parathyroid hormone and fibroblast growth factor 23

b VDBP model additionally adjusted for VDBP concentration, VDBP phenotype, and serum albumin concentration

**Supplemental Table 3: Association of PTH with Changes in BMD<sup>a</sup>**

| Model          | <b>Total Hip BMD</b>                         |        | <b>Thoracic BMD</b>                          |       | <b>Lumbar BMD</b>                            |       |
|----------------|----------------------------------------------|--------|----------------------------------------------|-------|----------------------------------------------|-------|
|                | Annual Change in BMD<br>Per Doubling (95%CI) | P      | Annual Change in BMD<br>Per Doubling (95%CI) | P     | Annual Change in BMD<br>Per Doubling (95%CI) | P     |
| Fully Adjusted | -0.3% (-0.4%, -0.1%)                         | <0.001 | -0.1% (-0.3%, 0.04%)                         | 0.124 | -0.1% (-0.3%, 0.1%)                          | 0.219 |

<sup>a</sup>Data Reported for fully adjusted models, adjusted for age, sex, race, season of measurement, clinic site an, BMI, baseline eGFR, serum calcium, phosphate, parathyroid hormone and fibroblast growth factor 23

**Supplemental Table 4: First Fracture Sites in Health ABC\***

| Fracture Site   | Number of Fractures |
|-----------------|---------------------|
| Hip/Pelvis      | 58                  |
| Upper Extremity | 54                  |
| Lower Extremity | 27                  |
| Spine           | 36                  |

\*3 fractures occurred without documentation of fracture site

**Supplemental Table 5. Association of Vitamin D Metabolites and the VMR with Fracture Risk in VDBP Subcohort**

|                             | VMR                      |       | 25D <sub>3</sub>         |       | 24,25D <sub>3</sub>      |       | 1,25D <sub>3</sub>       |       |
|-----------------------------|--------------------------|-------|--------------------------|-------|--------------------------|-------|--------------------------|-------|
|                             | HR Per 50% Lower (95%CI) | P     |
| Fully Adjusted <sup>a</sup> | 1.35 (0.73, 2.48)        | 0.337 | 1.12 (0.74, 1.69)        | 0.594 | 1.14 (0.83, 1.56)        | 0.412 | 1.51 (1.05, 2.17)        | 0.025 |
| VDBP Model <sup>b</sup>     | 1.34 (0.74, 2.44)        | 0.330 | 1.13 (0.73, 1.73)        | 0.587 | 1.14 (0.84, 1.55)        | 0.396 | 1.59 (1.09, 2.33)        | 0.016 |

a Adjusted for age, sex, race, season of measurement, clinic site an, BMI, baseline eGFR, serum calcium, phosphate, parathyroid hormone and fibroblast growth factor 23

b VDBP model additionally adjusted for VDBP concentration, VDBP phenotype, and serum albumin concentration

**Supplemental Table 6: Association of Vitamin D Metabolites and the VMR with PTH<sup>a</sup>**

|                | <b>VMR</b>                             |          | <b>25D</b>                             |          | <b>24,25D</b>                          |          | <b>1,25D</b>                           |          |
|----------------|----------------------------------------|----------|----------------------------------------|----------|----------------------------------------|----------|----------------------------------------|----------|
| <b>Model</b>   | <b>Beta Coef Per 1% Higher (95%CI)</b> | <b>P</b> | <b>Beta Coef Per 1% Higher (95%CI)</b> | <b>P</b> | <b>Beta Coef Per 1% Higher (95%CI)</b> | <b>P</b> | <b>Beta Coef Per 1% Higher (95%CI)</b> | <b>P</b> |
| Fully Adjusted | -0.5% (-0.7%, -0.4%)                   | <0.001   | -0.2% (-0.3%, -0.1%)                   | <0.001   | -0.3% (-0.3%, -0.2%)                   | <0.001   | 0.3% (0.2%, 0.4%)                      | <0.001   |

a Adjusted for age, sex, race, season of measurement, clinic site an, BMI, baseline eGFR, serum calcium, phosphate, parathyroid hormone and fibroblast growth factor 23
